# Supplementary material for: A coordination polymer of copper(i) iodide with 654 topology constructed from Cu4I4(DABCO)4
Source: Royal Society of Chemistry journal article supplement (doi:10.1039/b709852a), 2007-01-01
Supplement: b709852a.pdf [file b709852a.pdf]

## Supporting information

### Coordination Polymer of Copper(I) Iodide with 6<sup>5</sup>4 Topology Constructed from Cu<sub>4</sub>I<sub>4</sub>(DABCO)<sub>4</sub>

Minghui Bi, Guanghua Li, Jia Hua, Xiaomin Liu, Yawei Hu,  
Zhan Shi,\* and Shouhua Feng

*State Key Laboratory of Inorganic Synthesis & Preparative Chemistry, College of Chemistry,  
Jilin University, Changchun 130012, P. R. China*

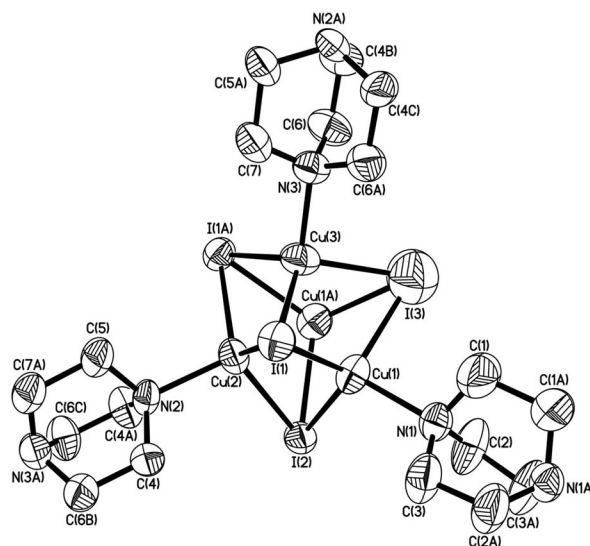

**Figure S1.** Structure Cu<sub>4</sub>I<sub>4</sub>(DABCO)<sub>4</sub> in the title compound with 50% probability thermal ellipsoids and the labeling scheme for all atoms.

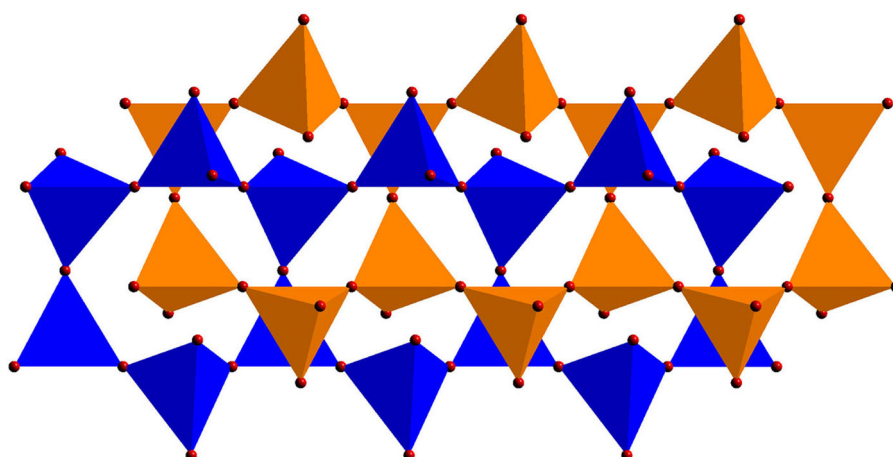

**Figure S2.** The interpenetration of the title compound. Each red ball represents the center of DABCO and the polyhedra is the  $(\text{Cu}_4\text{I}_4)_2(\text{DABCO})_4$ . The six-membered is in the boat configuration.

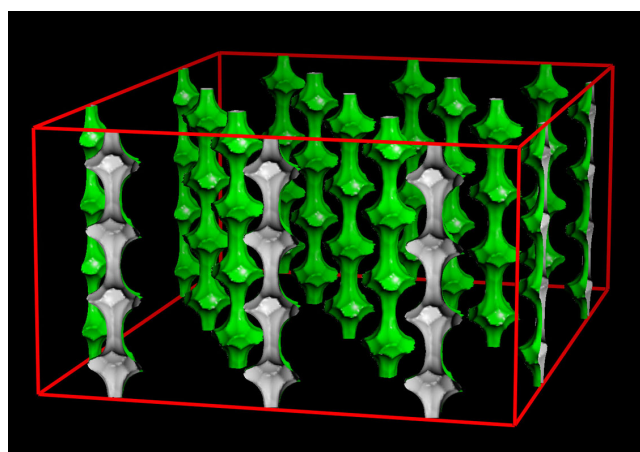

**Figure S3.** The accessible surface enclosing the void volumes of the title compound. The green surfaces are the accessible surfaces and the gray volumes are the void volumes

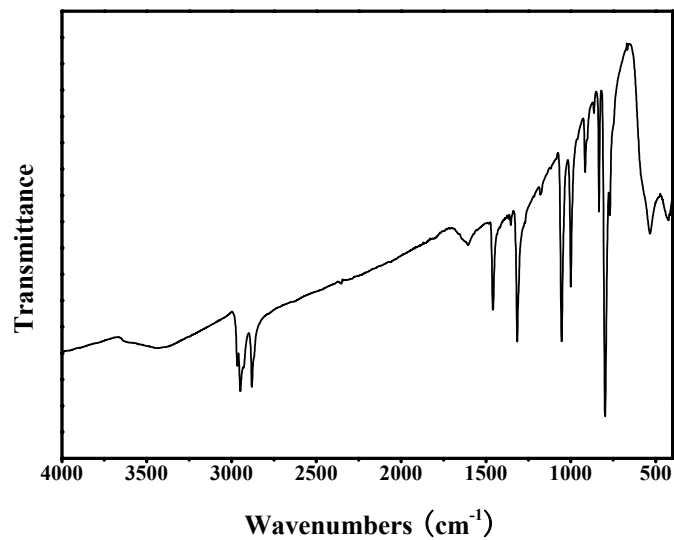

**Figure S4.** IR spectrum of the title compound
